# Supplementary material for: Pulsed Light as a Physical Defense Elicitor in Tomato cv. Marmande: Enhancing Defense Responses and Reducing Botrytis Infection
Source: MDPI journal article supplement (doi:10.3390/horticulturae11111331), 2025-11-04
Supplement: s1 [file horticulturae-3939091-supplementary.pdf › horticulturae-3939091-supplementary.pdf]

---

## Supplementary data

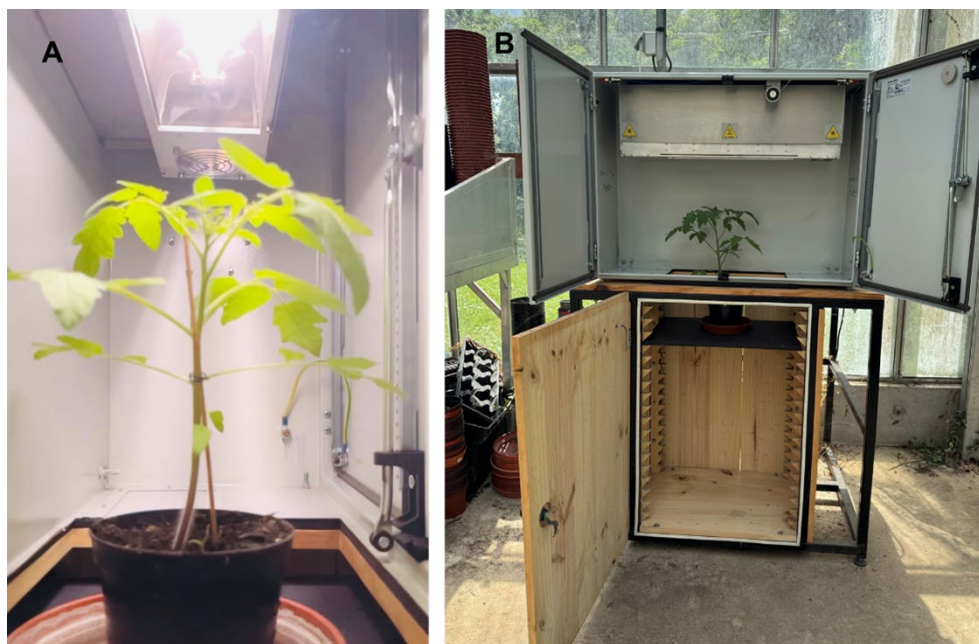

Figure S1: LP.Box system used for pulsed light exposure of tomato plants. A) Initial configuration of the LP.Box showing a tomato plant during light exposure. B) LP.Box mounted on an adjustable support to maintain a constant distance between the upper part of the plant and the light source during growth.

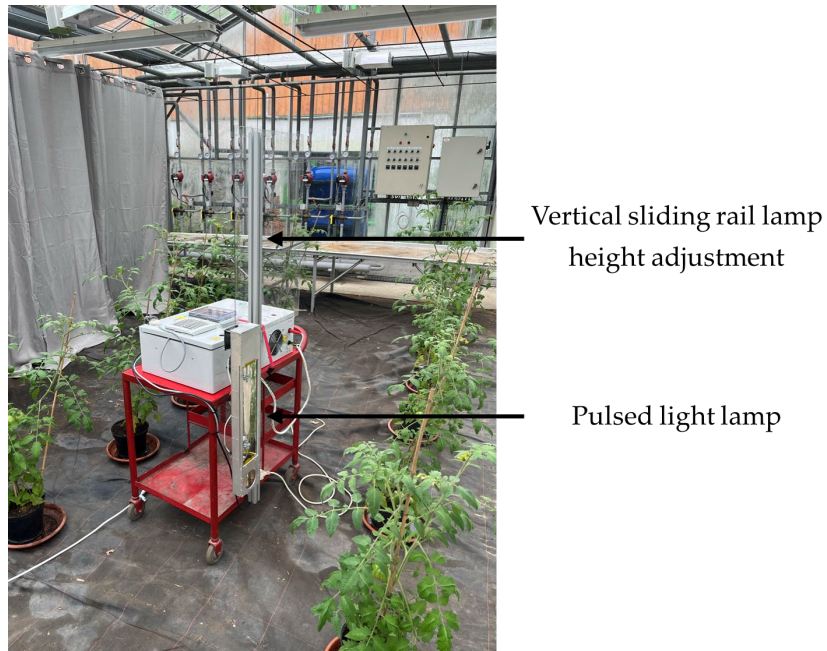

Figure S2: Mobile LP.Box prototype for pulsed light treatment

---

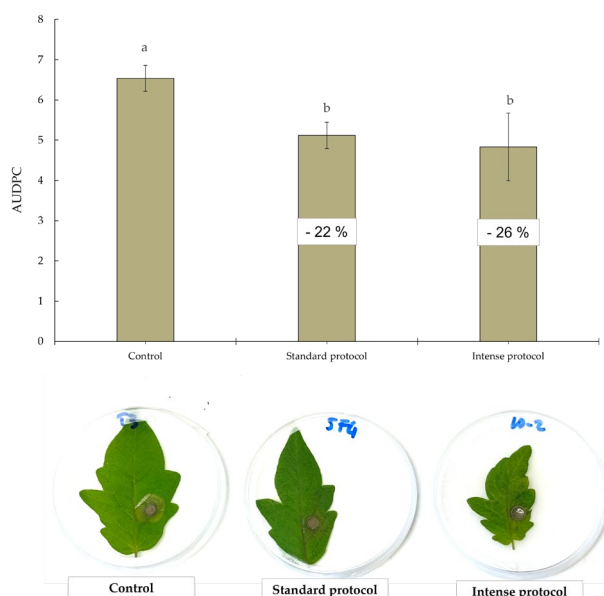

Figure S3: Comparison of AUDPC values and visual symptoms of *Botrytis cinerea* lesions on detached tomato leaves at 6 days post-inoculation, following pulsed light pretreatment (n = 8; mean  $\pm$  SD; One-way ANOVA)

Table S1: Evolution of OJIP parameters during and after pulsed light treatment in tomato leaves (mean  $\pm$  SE; n = 12; ANOVA/Kruskal-Wallis tests). Different letters indicate statistically distinct groups (p < 0.05) comparing only the “control”, “standard protocol” and “intense protocol” treatments at the same time point. Differences across time points are not shown.

| Indices                     | Day 5                     |                            |                            | Day 12                     |                            |                            |
|-----------------------------|---------------------------|----------------------------|----------------------------|----------------------------|----------------------------|----------------------------|
|                             | Control                   | Standard protocol          | Intense protocol           | Control                    | Standard protocol          | Intense protocol           |
| <b>F0</b>                   | 7191 $\pm$ 541 <b>b</b>   | 7402 $\pm$ 663 <b>b</b>    | 8960 $\pm$ 1680 <b>a</b>   | 6738 $\pm$ 1336 <b>b</b>   | 6568 $\pm$ 741 <b>b</b>    | 9003 $\pm$ 3204 <b>a</b>   |
| <b>Fm</b>                   | 44678 $\pm$ 3232 <b>a</b> | 45029 $\pm$ 2684 <b>a</b>  | 38308 $\pm$ 771 <b>b</b>   | 40981 $\pm$ 4441 <b>a</b>  | 37882 $\pm$ 3497 <b>b</b>  | 36485 $\pm$ 3608 <b>b</b>  |
| <b>Fv</b>                   | 38322 $\pm$ 1849 <b>a</b> | 37379 $\pm$ 2383 <b>a</b>  | 29144 $\pm$ 8601 <b>b</b>  | 34243 $\pm$ 3698 <b>a</b>  | 31315 $\pm$ 2895 <b>b</b>  | 27483 $\pm$ 5697 <b>c</b>  |
| <b>Fv/Fm</b>                | 0.84 $\pm$ 0.02 <b>a</b>  | 0.84 $\pm$ 0.01 <b>a</b>   | 0.74 $\pm$ 0.10 <b>b</b>   | 0.84 $\pm$ 0.01 <b>a</b>   | 0.83 $\pm$ 0.01 <b>a</b>   | 0.75 $\pm$ 0.11 <b>b</b>   |
| <b>Vj</b>                   | 0.33 $\pm$ 0.02 <b>b</b>  | 0.34 $\pm$ 0.02 <b>b</b>   | 0.66 $\pm$ 0.04 <b>a</b>   | 0.32 $\pm$ 0.02 <b>a</b>   | 0.34 $\pm$ 0.03 <b>a</b>   | 0.35 $\pm$ 0.03 <b>a</b>   |
| <b>Vi</b>                   | 0.65 $\pm$ 0.03 <b>a</b>  | 0.68 $\pm$ 0.03 <b>a</b>   | 0.66 $\pm$ 0.04 <b>a</b>   | 0.69 $\pm$ 0.05 <b>a</b>   | 0.67 $\pm$ 0.05 <b>a</b>   | 0.67 $\pm$ 0.04 <b>a</b>   |
| <b>Mo</b>                   | 0.44 $\pm$ 0.04 <b>b</b>  | 0.45 $\pm$ 0.04 <b>b</b>   | 0.56 $\pm$ 0.08 <b>a</b>   | 0.39 $\pm$ 0.03 <b>b</b>   | 0.44 $\pm$ 0.06 <b>a</b>   | 0.50 $\pm$ 0.16 <b>a</b>   |
| <b>Sm</b>                   | 1030 $\pm$ 636 <b>ab</b>  | 835 $\pm$ 603 <b>b</b>     | 1265 $\pm$ 661 <b>a</b>    | 666 $\pm$ 433 <b>b</b>     | 975 $\pm$ 666 <b>b</b>     | 1416 $\pm$ 510 <b>a</b>    |
| <b>Ss</b>                   | 0.74 $\pm$ 0.04 <b>b</b>  | 0.78 $\pm$ 0.03 <b>a</b>   | 0.65 $\pm$ 0.06 <b>c</b>   | 0.84 $\pm$ 0.03 <b>a</b>   | 0.80 $\pm$ 0.05 <b>b</b>   | 0.67 $\pm$ 0.12 <b>c</b>   |
| <b>N</b>                    | 1476 $\pm$ 1084 <b>ab</b> | 1108 $\pm$ 808 <b>b</b>    | 2027 $\pm$ 1201 <b>a</b>   | 970 $\pm$ 691 <b>b</b>     | 1315 $\pm$ 1051 <b>b</b>   | 2340 $\pm$ 1183 <b>a</b>   |
| <b><math>\Psi_o</math></b>  | 0.67 $\pm$ 0.02 <b>a</b>  | 0.66 $\pm$ 0.02 <b>b</b>   | 0.64 $\pm$ 0.02 <b>c</b>   | 0.68 $\pm$ 0.02 <b>a</b>   | 0.66 $\pm$ 0.03 <b>a</b>   | 0.65 $\pm$ 0.03 <b>a</b>   |
| <b><math>\phi Eo</math></b> | 0.56 $\pm$ 0.02 <b>a</b>  | 0.55 $\pm$ 0.02 <b>a</b>   | 0.48 $\pm$ 0.07 <b>b</b>   | 0.57 $\pm$ 0.02 <b>a</b>   | 0.54 $\pm$ 0.03 <b>b</b>   | 0.49 $\pm$ 0.09 <b>b</b>   |
| <b><math>\phi Do</math></b> | 0.16 $\pm$ 0.008 <b>b</b> | 0.162 $\pm$ 0.009 <b>b</b> | 0.256 $\pm$ 0.096 <b>a</b> | 0.159 $\pm$ 0.009 <b>c</b> | 0.173 $\pm$ 0.011 <b>b</b> | 0.253 $\pm$ 0.106 <b>a</b> |
| <b>PIABS</b>                | 6.73 $\pm$ 0.56 <b>a</b>  | 6.34 $\pm$ 1.04 <b>a</b>   | 3.03 $\pm$ 1.99 <b>b</b>   | 7.49 $\pm$ 1.57 <b>a</b>   | 5.92 $\pm$ 1.46 <b>b</b>   | 3.97 $\pm$ 2.45 <b>c</b>   |
| <b>ABS/RC</b>               | 1.60 $\pm$ 0.06 <b>b</b>  | 1.53 $\pm$ 0.06 <b>c</b>   | 2.16 $\pm$ 0.49 <b>a</b>   | 1.42 $\pm$ 0.05 <b>c</b>   | 1.52 $\pm$ 0.12 <b>b</b>   | 2.16 $\pm$ 0.73 <b>a</b>   |
| <b>Tro/RC</b>               | 1.34 $\pm$ 0.05 <b>b</b>  | 1.29 $\pm$ 0.04 <b>c</b>   | 1.56 $\pm$ 0.15 <b>a</b>   | 1.19 $\pm$ 0.04 <b>c</b>   | 1.26 $\pm$ 0.09 <b>b</b>   | 1.59 $\pm$ 0.28 <b>a</b>   |
| <b>Eto/RC</b>               | 0.9 $\pm$ 0.05 <b>b</b>   | 0.85 $\pm$ 0.03 <b>c</b>   | 1.03 $\pm$ 0.1 <b>a</b>    | 0.8 $\pm$ 0.03 <b>b</b>    | 0.8 $\pm$ 0.04 <b>b</b>    | 0.98 $\pm$ 0.12 <b>a</b>   |
| <b>Dio/RC</b>               | 0.25 $\pm$ 0.01 <b>b</b>  | 0.25 $\pm$ 0.02 <b>b</b>   | 0.60 $\pm$ 0.36 <b>a</b>   | 0.23 $\pm$ 0.02 <b>c</b>   | 0.27 $\pm$ 0.04 <b>b</b>   | 0.56 $\pm$ 0.4 <b>a</b>    |
